# Supplementary material for: Diversity of an uncommon elastic hypersaline microbial mat along a small-scale transect
Source: bioRxiv or medRxiv preprint supplement (doi:10.1101/2021.03.04.433984), 2021-11-28
Supplement: Supplementary file [file media-1.pdf]

## Supplementary materials

A

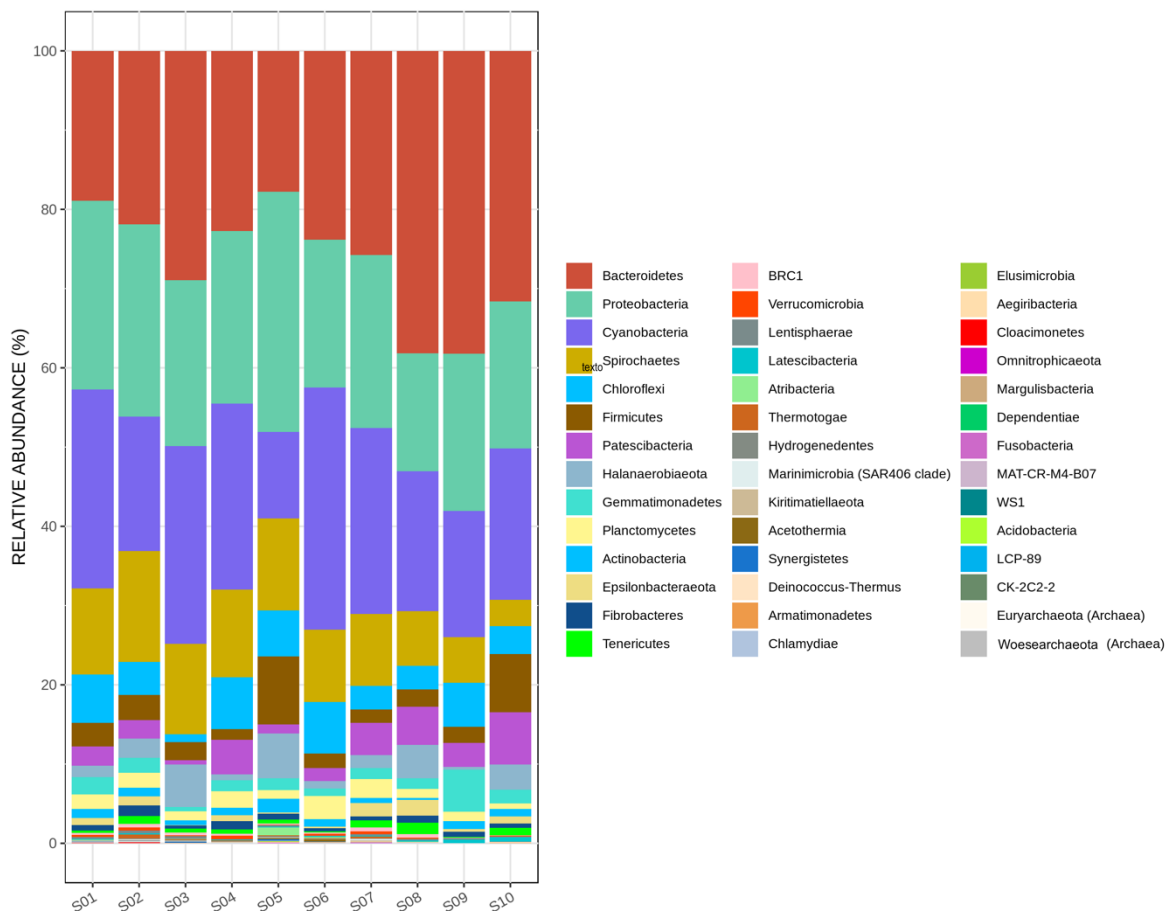

Suppl. Fig. 1

(A) Phylum composition within 16S rRNA gene database (B) Kingdom composition (based on UNITE database eukaryotic taxonomy) within Forward-Only ITS region database.

B

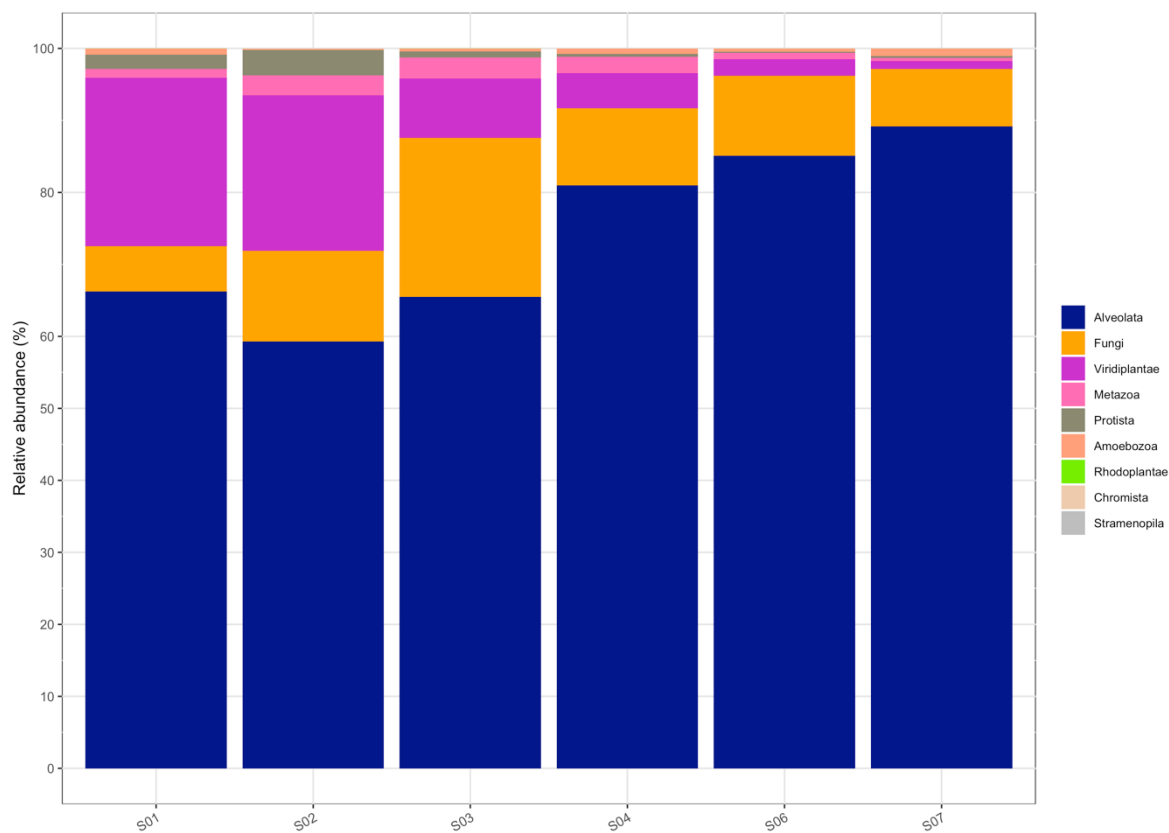

Suppl. Fig. 1

(A) Phylum composition within 16S rRNA gene database (B) Kingdom composition (based on UNITE database eukaryotic taxonomy) within Forward-Only ITS region database.

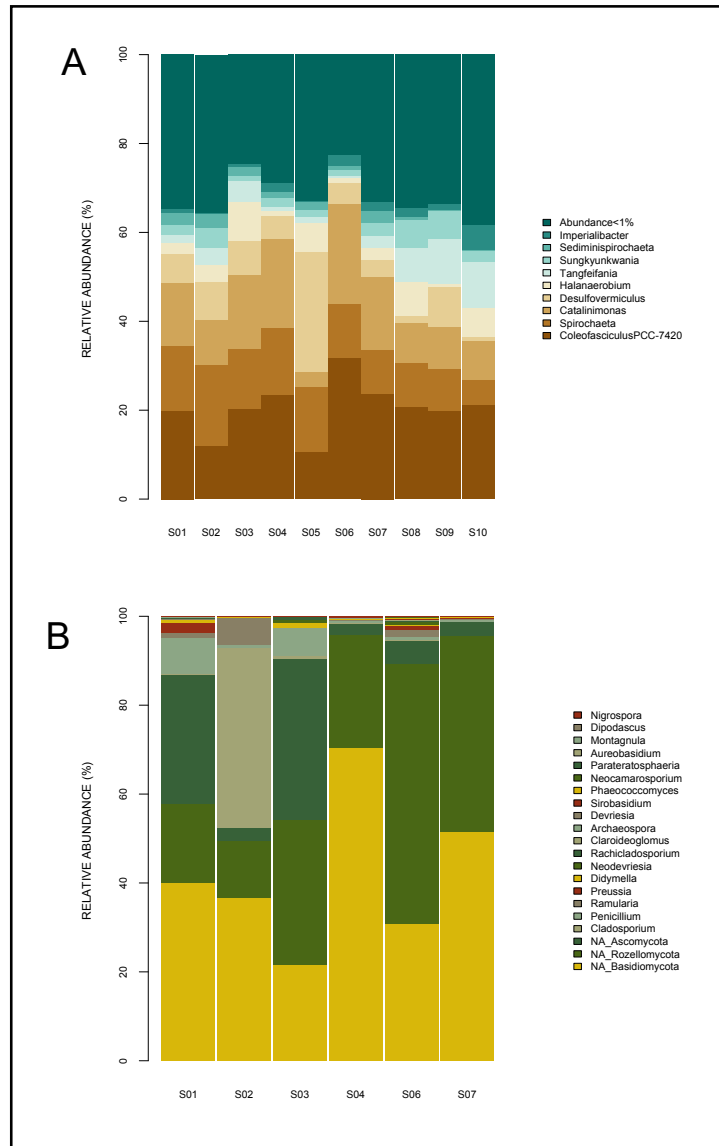

Suppl. Fig. 2

Rarefaction curves for 16S rRNA gene database (A) and ITS region Forward-Only ITS database (B).

A 16S Bray-Curtis

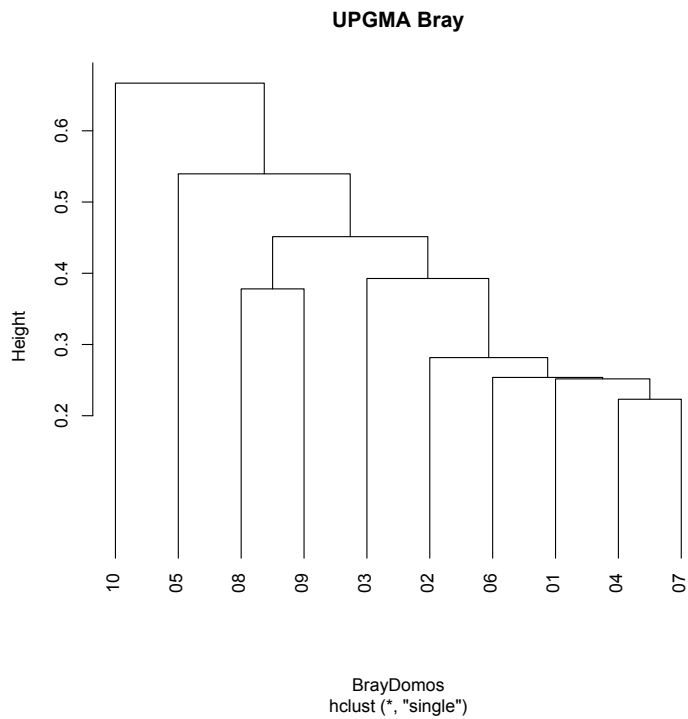

A 16S Jaccard

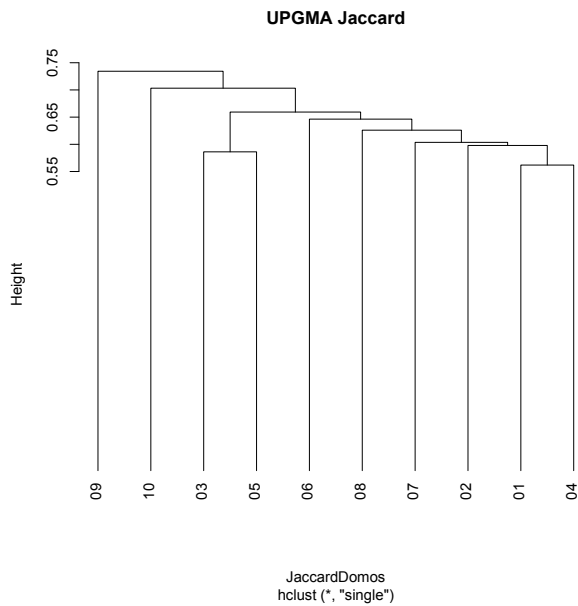

Suppl. Fig. 3

UPGMA dendrogram showing composition similarities among sampling sites (Forward-Only ITS database for Eucarya UPGMA). Branch length represent Bray-Curtis and Jaccard-1 dissimilarity coefficient, based on (A) abundance of 16S rDNA sequences ASVs, and (B) abundance of ITS region database ASVs. The numbers (height) are Bray-Curtis and Jaccard values.

B ITS Bray-Curtis

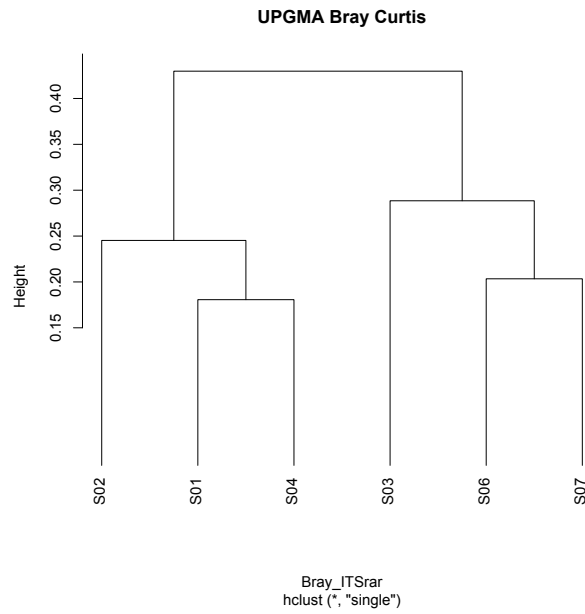

B ITS Jaccard

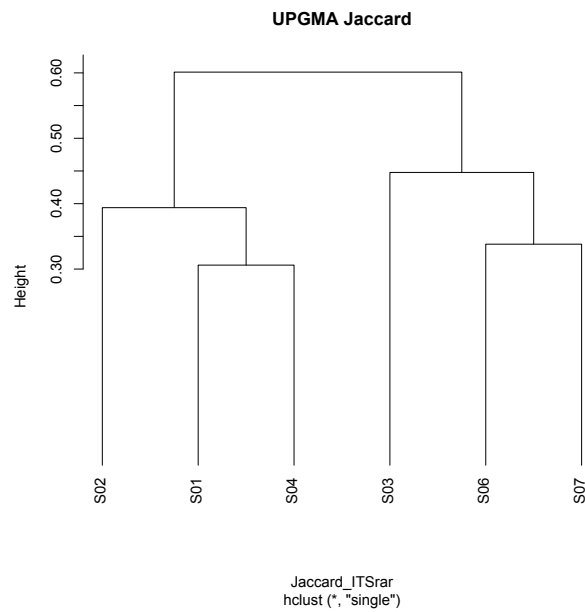

Suppl. Fig. 3

UPGMA dendrogram showing composition similarities among sampling sites (Forward-Only ITS database for Eucarya UPGMA). Branch length represent Bray-Curtis and Jaccard-1 dissimilarity coefficient, based on (A) abundance of 16S rDNA sequences ASVs, and (B) abundance of ITS region database ASVs. The numbers (height) are Bray-Curtis and Jaccard values.

A

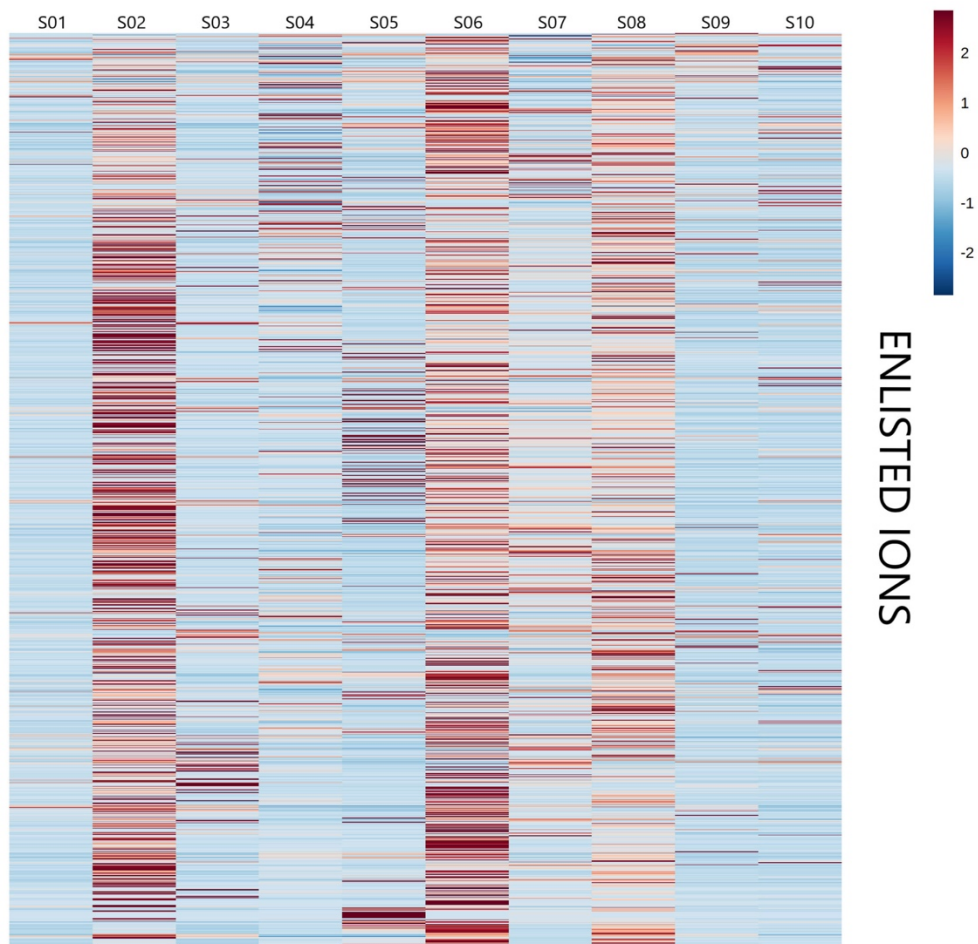

Suppl. Figure 4

Heatmap analysis showing relative abundance of metabolite features (MS ions in positive mode) in the Archaeal Domes mats samples. On the scale bar, brick red color indicates increased metabolite levels, and blue color represents decreased levels. A shows non clustered samples and sites, B clustered samples and sites.

B

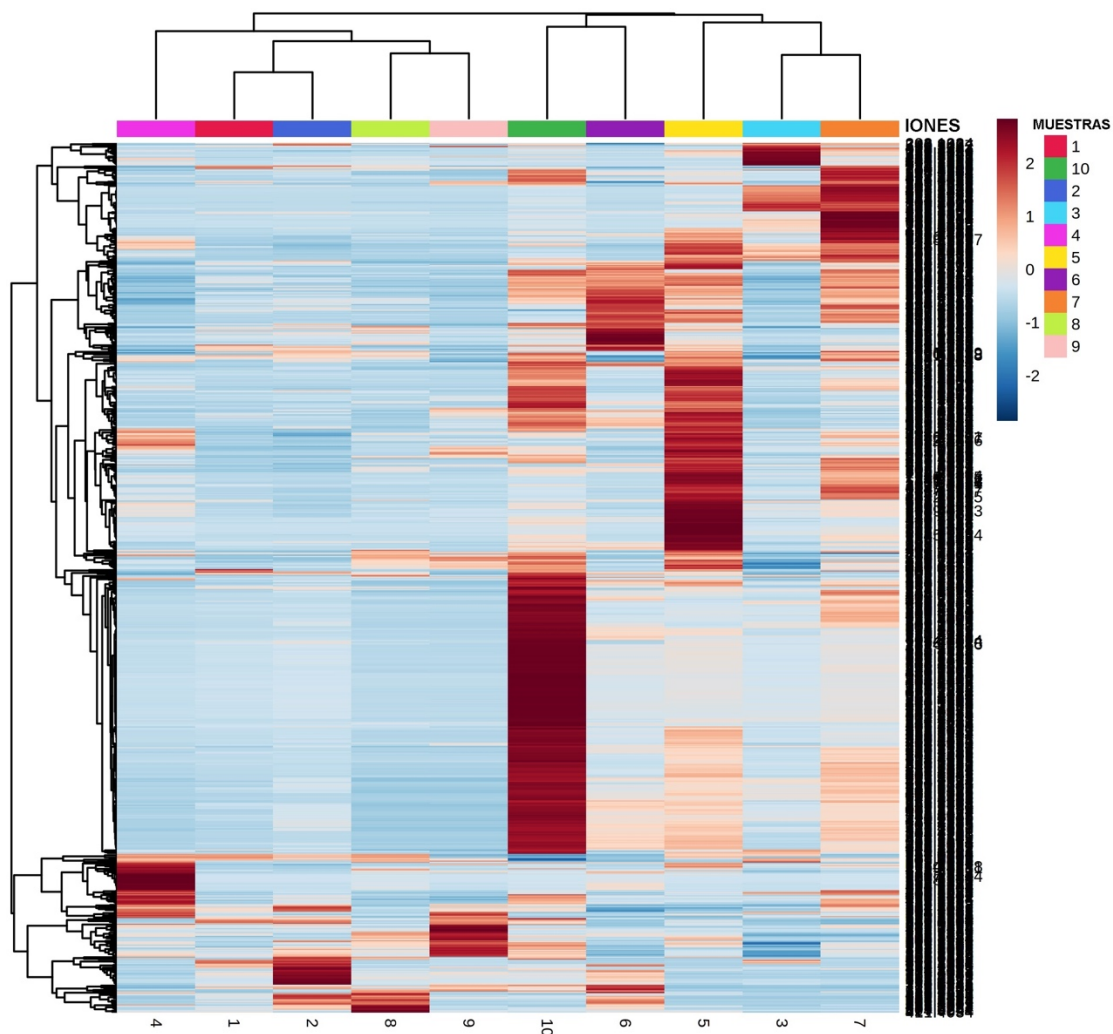

Suppl. Figure 4

Heatmap analysis showing relative abundance of metabolite features (MS ions in positive mode) in the Archaeal Domes mats samples. On the scale bar, brick red color indicates increased metabolite levels, and blue color represents decreased levels. A shows non clustered samples and sites, B clustered samples and sites.

|                                                | % ITS library |
|------------------------------------------------|---------------|
| <i>Fuscheria nodosa</i> (Alveolata)            | 0.0261        |
| <i>Enchelys gasterosteus</i> (Alveolata)       | 0.0014        |
| <i>Strombidium guangdongense</i> (Alveolata)   | 0.0214        |
| <i>Fabrea salina</i> (Alveolata)               | 0.5524        |
| <i>Nassula labiata</i> (Alveolata)             | 0.0007        |
| <i>Paracladotricha salina</i> (Alveolata)      | 0.0207        |
| <i>Thraustochytrium aureum</i> (Stramenopila)  | 0.0021        |
| Uncultured Amoebozoa (Amoebozoa)               | 0.0043        |
| <i>Vannella simplex</i> (Amoebozoa)            | 0.6675        |
| <i>Chlamydomonadales</i> sp. (Viridiplantae)   | 0.0035        |
| <i>Hamakko caudatus</i> (Viridiplantae)        | 0.0018        |
| <i>Eleusine indica</i> (Viridiplantae)         | 0.0078        |
| <i>Nephelochloa orientalis</i> (Viridiplantae) | 0.0086        |

Suppl. Table 1.

List of ASVs Blast hits with <90%, of non-fungal Merge ITS database.





|                | Possitive | Negative |
|----------------|-----------|----------|
| Arquea total   | 80        | 9        |
| Arch-Bact      | 18        | 5        |
| Arch-Arch      | 32        | 0        |
| Arch-Fung      | 19        | 4        |
| Arch-Euk       | 11        | 0        |
| <br>           |           |          |
| Bacteria total | 63        | 22       |
| Bac-Bact       | 18        | 9        |
| Bact-Arch      | 18        | 5        |
| Bact-Fung      | 9         | 5        |
| Bact-Euk       | 18        | 3        |
| <br>           |           |          |
| Fungi total    | 49        | 14       |
| Fung-Bact      | 9         | 5        |
| Fung-Arch      | 19        | 4        |
| Fung-Fung      | 10        | 3        |
| Fung-Euk       | 11        | 2        |
| <br>           |           |          |
| Euk total      | 44        | 6        |
| Euk-Bact       | 18        | 3        |
| Euk-Arch       | 11        | 0        |
| Euk-Fung       | 11        | 2        |
| Euk-Euk        | 4         | 1        |

Suppl. Table 3.

Counts of significant negative and positive correlations from Pearson Correlation Analysis (Figure 5).

Tentatively identified microbial metabolites in samples S1-S10 by GNPS and detailed metabolomic analysis.

| Observed<br><i>m/z</i> [M+H] <sup>+</sup> | Molecular<br>formula                                          | Mass error<br>(in ppm) | Tentative identification                                                                              | Sample             |
|-------------------------------------------|---------------------------------------------------------------|------------------------|-------------------------------------------------------------------------------------------------------|--------------------|
| 290.0811                                  | C <sub>18</sub> H <sub>11</sub> NO <sub>3</sub>               | -0.2                   | nostodione A                                                                                          | S2,S6-S8           |
| 316.2032                                  | C <sub>18</sub> H <sub>25</sub> N <sub>3</sub> O <sub>2</sub> | +3.9                   | indolactam 1, martensine A                                                                            | S1-S10             |
| 317.2229                                  | C <sub>19</sub> H <sub>28</sub> N <sub>2</sub> O <sub>2</sub> | +1.9                   | benzastatin A                                                                                         | S2,S4,S5,S7,S9,S10 |
| 318.2433                                  | C <sub>20</sub> H <sub>31</sub> NO <sub>2</sub>               | +1.7                   | periconiasin G                                                                                        | S1-3,S6,S7,S9,S10  |
| 319.1182                                  | C <sub>17</sub> H <sub>18</sub> O <sub>6</sub>                | +1.7                   | dechlorogriseofulvin                                                                                  | S7                 |
| 319.1655                                  | C <sub>17</sub> H <sub>22</sub> N <sub>2</sub> O <sub>4</sub> | +0.8                   | phomamide, daryamide C,<br>yomaymycin I                                                               | S1-S10             |
| 353.0792                                  | C <sub>17</sub> H <sub>17</sub> ClO <sub>6</sub>              | +1.6                   | griseofulvin                                                                                          | S7                 |
| 387.1797                                  | C <sub>22</sub> H <sub>26</sub> O <sub>6</sub>                | -1.3                   | gibbestatin B, furaquinocin<br>H, colletofragarone A1,<br>pitholide B,<br>dideacetylparasiticolide A. | S1-S10             |
| 496.3401                                  | C <sub>31</sub> H <sub>45</sub> NO <sub>4</sub>               | -4.1                   | 8,9-dihydroindanomycin,<br>neindanomycin                                                              | S1-S9              |
| 515.2636                                  | C <sub>29</sub> H <sub>38</sub> O <sub>8</sub>                | -0.7                   | citreo hybridone B, setosusin,<br>roridin E, ganoboninone A                                           | S1-S9              |
| 256.1026                                  | ND                                                            | ND                     | <sup>a</sup>                                                                                          | S1-S10             |
| 304.2995                                  | ND                                                            | ND                     | <sup>a</sup>                                                                                          | S1-S10             |
| 1068.4847                                 | ND                                                            | ND                     | <sup>a</sup>                                                                                          | S1-S10             |

ND, not determined; <sup>a</sup>, potentially new compound.

Suppl. Table 4.

Tentatively identified microbial metabolites in samples S1-S10 by GNPS and detailed metabolomic analysis.

|     | psc_16S    | psc_rar_16S | psc_abun_16S | psc_ITS    | psc_rar_ITS | psc_abun_ITS |
|-----|------------|-------------|--------------|------------|-------------|--------------|
| S1  | 0.11060947 | 0.30236487  | 0.04866875   | 0.10968344 | 0.30487551  | 0.10002044   |
| S2  | 0.10863735 | 0.29149669  | 0.0605547    | 0.09490329 | 0.2868876   | 0.10927695   |
| S3  | 0.09063427 | 0.27552425  | 0.05493335   | 0.08496886 | 0.26553793  | 0.12463795   |
| S4  | 0.11408563 | 0.32433312  | 0.05225602   | 0.11582347 | 0.30695845  | 0.09225003   |
| S5  | 0.07809136 | 0.24593114  | 0.04262518   |            |             |              |
| S6  | 0.11513793 | 0.30216016  | 0.08670753   | 0.11553622 | 0.29763445  | 0.1295801    |
| S7  | 0.11590233 | 0.30581557  | 0.07509745   | 0.12709692 | 0.37551424  | 0.11824146   |
| S8  | 0.07955718 | 0.24829185  | 0.04620871   |            |             |              |
| S9  | 0.13062694 | 0.34927144  | 0.07490645   |            |             |              |
| S10 |            | 0.1354835   | 0.33490847   | 0.08888336 |             |              |

Suppl. Table 5  
nmdPSC values
